## REVIEW

## Race and ethnicity: Risk factors for fungal infections?

Jeffrey D. Jenks<sup>1,2\*</sup>, Chioma Inyang Aneke<sup>3,4</sup>, Mohanad M. Al-Obaidi<sup>5</sup>, Matthias Egger<sup>6</sup>, Lorena Garcia<sup>7</sup>, Tommi Gaines<sup>8</sup>, Martin Hoenigl<sup>6,8‡\*</sup>, George R. Thompson, III<sup>9,10,11‡</sup>

**1** Durham County Department of Public Health, Durham, North Carolina, United States of America, **2** Division of Infectious Diseases, Department of Medicine, Duke University, Durham, North Carolina, United States of America, **3** Department of Laboratory Medicine, National Institutes of Health, Bethesda, Maryland, United States of America, **4** Department of Veterinary Pathology and Microbiology, University of Nigeria, Nsukka, Nigeria, **5** Division of Infectious Diseases, Department of Medicine, University of Arizona, Tucson, Arizona, United States of America, **6** Division of Infectious Diseases, Medical University of Graz, Graz, Austria, **7** Department of Public Health Sciences, UC Davis School of Medicine, Davis, California, United States of America, **8** Division of Infectious Diseases and Global Public Health, Department of Medicine, School of Medicine, University of California, San Diego, California, United States of America, **9** University of California Davis Center for Valley Fever, Sacramento, California, United States of America, **10** Department of Internal Medicine, Division of Infectious Diseases, University of California Davis Medical Center, Sacramento, California, United States of America, **11** Department of Medical Microbiology and Immunology, University of California Davis, Davis, California, United States of America

‡ These authors are joint senior authors on this work.

\* [jeffrey.jenks@duke.edu](mailto:jeffrey.jenks@duke.edu) (JDJ); [hoeniglmartin@gmail.com](mailto:hoeniglmartin@gmail.com) (MH)

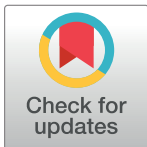

## OPEN ACCESS

**Citation:** Jenks JD, Aneke CI, Al-Obaidi MM, Egger M, Garcia L, Gaines T, et al. (2023) Race and ethnicity: Risk factors for fungal infections? PLoS Pathog 19(1): e1011025. <https://doi.org/10.1371/journal.ppat.1011025>

**Editor:** Chaoyang Xue, Rutgers University, UNITED STATES

**Published:** January 5, 2023

**Copyright:** © 2023 Jenks et al. This is an open access article distributed under the terms of the [Creative Commons Attribution License](https://creativecommons.org/licenses/by/4.0/), which permits unrestricted use, distribution, and reproduction in any medium, provided the original author and source are credited.

**Funding:** The authors received no specific funding for this work.

**Competing interests:** I have read the journal's policy and the authors of this manuscript have the following competing interests: J.D.J. received research funding from Astellas, F2G, and Pfizer. M. A. received honoraria from Shionogi and La Jolla pharmaceuticals for participating in advisory board meetings. MH has received research funding from Gilead Sciences Europe Ltd, Astellas, Merck Sharp and Dohme, Scynexis, F2G, Euroimmune and Pfizer. G.R.T has received research grants and consultancy fees from Astellas, Amplyx, Cidara, and Mayne. All other authors declare no conflicts of interest.

## Abstract

Racial and ethnic identities, largely understood as social rather than biologic constructs, may impact risk for acquiring infectious diseases, including fungal infections. Risk factors may include genetic and immunologic differences such as aberrations in host immune response, host polymorphisms, and epigenomic factors stemming from environmental exposures and underlying social determinants of health. In addition, certain racial and ethnic groups may be predisposed to diseases that increase risk for fungal infections, as well as disparities in healthcare access and health insurance. In this review, we analyzed racial and ethnic identities as risk factors for acquiring fungal infections, as well as race and ethnicity as they relate to risk for severe disease from fungal infections. Risk factors for invasive mold infections such as aspergillosis largely appear related to environmental differences and underlying social determinants of health, although immunologic aberrations and genetic polymorphisms may contribute in some circumstances. Although black and African American individuals appear to be at high risk for superficial and invasive *Candida* infections and cryptococcosis, the reasons for this are unclear and may be related to underlying social determinants of health, disparities in access to healthcare, and other socioeconomic disparities. Risk factors for all the endemic fungi are likely largely related to underlying social determinants of health, socioeconomic, and health disparities, although immunologic mechanisms likely play a role as well, particularly in disseminated coccidioidomycosis.

## Introduction

Differences in biological sex are known factors that increase the risk of acquiring a number of infectious diseases, including invasive fungal infections, which largely have a male predilection. In one recent review of this topic, all invasive fungal infections except candidiasis were shown to be overrepresented in biological males, ranging from invasive aspergillosis (IA) (51% males overall, although most studies in the literature report a larger male predominance) to cryptococcosis (74% males) [1]. Factors that explain the male predominance of invasive fungal infections may include differences in steroid hormone homeostasis, sex-specific immune response, behavioral factors such as occupational exposure, medical comorbidities such as human immunodeficiency virus (HIV), and gender disparities in health care, among others [1].

Much less is known about the relationship between race and ethnicity and risk of acquiring invasive fungal infections. Admittedly, this is a complicated, yet essential, question to address. Categorizing individuals into racial groups, as has historically been reported in prior publications, is complicated as race is now understood to largely be a social rather than a biologic construct [2–5]. While historically racial categories have existed as a means to categorize common hereditary traits, such as skin color, there is more genetic variability within racial groups than between them. In a seminal paper published in 1972, Richard Lewontin showed that 85.4% of genetic diversity within humans occurs within populations in a racial group, 8.3% of variation between populations within racial groups, and only 6.3% of genetic variation between racial groups [6]. In addition, grouping individuals into broad racial and ethnic categories is equally fraught. For example, an individual born in Cuba with West African ancestry may identify their ethnicity as Hispanic or Latino, but feel their lived experience is very different from other Cuban nationals who identify as white. Thus, drawing conclusions between race and ethnicity (social constructs) and human genetics (a biologic construct) is complex and multi-faceted, prompting professional organizations such as the American Medical Association to provide guidance on the use of race, ethnicity, and genomics in medical and scientific literature [5,7].

With these limitations in mind, here we review the literature on racial and ethnic differences and risk of invasive fungal infection caused by molds, yeast, and selected endemic mycoses in the United States (US). The review was performed within the context that race and ethnicity categorizations are incredibly complicated entities and that multiple non-biologic factors may influence risk of invasive fungal infections, both between and within racial and ethnic groups.

## Results

### Human genomic ancestry and predisposition to fungal infections

Fungi are opportunistic pathogens and range from ubiquitous organisms (e.g., *Aspergillus* spp.) with frequent inhalational exposure, to commensals (e.g., *Candida* spp.) requiring a breach in the normal protective barriers of the skin or gastrointestinal system, to the endemic fungi (e.g., *Histoplasma* and *Coccidioides* spp.) present within specific geographic regions. The host immune response must simultaneously kill invading fungal organisms, while minimizing the surrounding inflammatory reaction and maintaining immune homeostasis [8].

The constitutive mechanisms of immunity are displayed at locations with frequent interaction with fungal pathogens including the mucosa of the respiratory epithelium and the gastrointestinal tract [9]. Host defensins, collectins, and the complement system provide nonspecific defense and recognition of fungi. These pathways are highly conserved; however, medication-induced complement defects have been associated with IA [10]. Host-cell expression of pattern

recognition receptors, including Toll-like receptors (TLRs) and C-type lectin receptors (CLRs) sense pathogen-associated molecular patterns (PAMPs) are present in fungi [9]. Numerous single-nucleotide polymorphisms (SNPs) within human TLRs (TLR1 [11], TLR4 [12–15], TLR6 [11], among others) and CLRs (Dectin-1—in particular the Y238X SNP [16–18]; DC-SIGN, mannose receptor and mannose-binding lectin [19–22]) have been identified as risk factors for fungal disease. DC-SIGN and pentraxin 3 have been identified as key macrophage receptors assisting in the recognition and phagocytosis of fungal species with deleterious polymorphisms identified [23–25].

Following fungal recognition and phagocytosis, intracellular killing occurs by the generation of NADPH-dependent reactive oxidant species (ROS). Defects within this pathway (e.g., chronic granulomatous disease) exhibit heightened susceptibility to both bacterial and some fungal pathogens. Additional signaling pathways initiating antifungal immunity have also been identified, but not yet fully characterized, including the calcium-calcineurin-NFAT pathway.

Neutrophils are well known for their role in providing protection against invading fungal pathogens and their recruitment is dependent upon chemokine release [26], and polymorphisms resulting in CXCL10 expression changes have been found associated with aspergillosis [27]. Subsequent SYK-CARD9 signaling induces the inflammasome and results in the activation of proinflammatory cytokines. Defects in the CARD9 pathway have been found predisposing to chronic mucocutaneous candidiasis [28] and disseminated aspergillosis [29], while polymorphisms in a number of cytokines have also been found to predispose to fungal disease: aspergillosis (IL-1 [30], IL-10 [31,32], IL-15 [32], and IL-23); candidiasis (IL-4 [33,34]; paracoccidioidomycosis (IL-4) [35]; and blastomycosis (IL-6) [36]. Polymorphisms within the tumor necrosis factor- $\alpha$  (TNF- $\alpha$ ) gene [32] and its receptors [37,38] have also been associated with susceptibility to aspergillosis. Polymorphisms within the interferon- $\gamma$  (INF- $\gamma$ ) gene [39] and its receptor have also been associated with fungal disease risk, and auto-antibodies to INF- $\gamma$  have similarly seen an increased rate of fungal infections and may be more frequent in some patient groups [40].

Host neutrophils also release antimicrobial peptides (e.g., defensins) and proteases, and attempt to sequester iron availability in response to fungal invasion [8,41]. Plasminogen also appears to be a key regulator in susceptibility to aspergillosis [42]. Polymorphisms, including changes in copy number, may confer changes in susceptibility and are the source of ongoing investigation.

Extensive investigation of T cells over the last 3 decades has further enhanced our understanding in their role in providing protective immunity [43]. Chronic noninvasive forms of aspergillosis such as asthmatic exacerbations, allergic bronchopulmonary aspergillosis, and chronic pulmonary aspergillosis are also defined by aberrant T-cell responses. A dominant Th2 response is observed in allergic type diseases, while a proinflammatory phenotype has been described in those with chronic forms of pulmonary aspergillosis and improvements in our understanding of this complex and highly coordinated immune response may lead to the recognition of immunogenetic factors responsible.

An association of the immunogenetic factors responsible for protection or susceptibility to invasive fungal diseases with genomic ancestry has been demonstrated for only a few diseases and seems to be most clear with disseminated coccidioidomycosis. The aforementioned SNPs in IL-6 associated with blastomycosis susceptibility appear to be overrepresented in the Hmong population conveying increased risk [36]. The Y238X Dectin-1 polymorphism associated with increased fungal risk is overrepresented in some populations [16] and may be responsible for the increased risk for fungal diseases observed in certain demographic groups. Human leukocyte antigens (HLA) class II antigens (HLA-A9 and HLA-B9 antigens) and ABO

blood type B have been associated with more severe coccidioidomycosis infection, although it is unclear if there is a causal association or if this association is merely due to an increased proportion of these phenotypes in Filipino and black or African American individuals [44,45]. In addition, in another study the HLA class II-DRB1\*1301 allele was a marker for disseminated coccidioidomycosis, independent of race or ethnicity [46].

Recent work analyzing the association between environmental exposure, psychosocial stressors, and nutrition has found these important influences in the patient genome and epigenome over multiple generations [47]. These social determinants of health may lead to alterations in patient DNA methylation, chromatin remodeling, histone modification, and regulatory RNA changes and subsequently alter the patient immune response [48]. The epigenetic changes may alter cell type-specific and temporal gene expression ultimately resulting in alterations of individual patient risk for fungal infections [49]. There have been few studies evaluating the epigenetic changes that may be at play in susceptibility to fungal disease; however, this remains a promising potential area of inquiry and is a key area of investigation that may help explain differing risk for invasive fungal disease between patient groups.

**Social determinates of health and fungal infections.** In the US, certain racial and ethnic groups may endure a greater burden of fungal disease due to underlying comorbidities including HIV, diabetes, and hematologic malignancies. For example, African Americans and Latinos accounted for nearly 71% of all new HIV diagnoses in 2019, but only represent 30% of the overall US population [50]. Significant racial and ethnic disparities in the incidence and survival of hematologic malignancies have also been documented [51,52]. Furthermore, racial and ethnic differences in diabetes and corresponding complications have been thoroughly discussed in the literature and are clear risk factors for IFIs [53–55].

Race and ethnicity are socially constructed terms without a biological basis in the scientific literature [5,56]. Rather, racial inequities observed in fungal disease rates are likely driven by the circumstances in which individuals are born, live, work, and age [57]. Intersectionality is a framework that helps us understand how socialized categories like race and ethnicity interact with other social factors such as gender, socioeconomic status, occupation, and employment, combine, overlap, and interact to create health inequalities in the US [58,59]. For example, Coronavirus Disease 2019 (COVID-19) mortality data initially pointed to biologic sex differences as men died at higher rates than women, but these differences were moderated by race, ethnicity, geographic location within the US, and time [60]. As further data emerged, it pointed to a complex intersection of social factors, similar to other coronavirus pandemics, that included race, ethnicity, occupation, socioeconomic status, and the social determinants of health [61–65]. Pulmonary aspergillosis, an invasive fungal disease, is well known to cause a superinfection in critically ill patients with COVID-19 infection, particularly those with underlying comorbidities such as hypertension, COPD, and HIV [66–69]. These comorbidities, as previously noted, are also associated with health care access and utilization, poverty, race, and ethnicity, similar to other social determinants of health that interacted to shape COVID-19 health disparities in the US.

Notably, communities of color are disproportionately affected by poorer social, economic, and environmental conditions that can contribute to elevated vulnerabilities from fungal infections. Healthcare accessibility has previously been discussed by our team as a plausible explanation of gender disparities in invasive fungal infections [1]. Regarding racial and ethnic disparities, US census data demonstrates that African Americans, Latinos, American Indians, and Alaska Natives have higher rates of being uninsured relative to white individuals [70]. Uninsured adults are more likely than those with insurance to postpone healthcare or forgo it altogether, leading to greater inequities in the delivery of healthcare. Moreover, despite the implementation of US policies to reduce healthcare disparities, recent research covering a

20-year timespan demonstrated that African Americans and Latinos continue to experience more barriers to healthcare services compared with white individuals [71].

### Differences in race/ethnicity in investigated pathogens

**Molds. *Aspergillosis.*** *Aspergillus* spp. can cause a spectrum of disease in humans, from non-invasive diseases such as allergic bronchopulmonary aspergillosis that are associated with exacerbation of different underlying lung diseases, to life-threatening infections such as invasive pulmonary aspergillosis, including in those with COVID-19 infection [8,67,68,72]. Climate factors play a role in the airborne spread of the spores that can vary based on regions and seasons [73] and more importantly, can result in selection pressure for antifungal resistant ones, especially in regions that have exposure to azoles pesticides [74]. Therefore, to understand any association between *Aspergillus* spp.-related disease and race as a risk factor, one should understand the underlying risk factors of those diseases and their racial propensities.

IA has a high risk of morbidity and mortality, and can present as an invasive disease of the lung and the sinuses, and in rare cases present as a disseminated disease, often related to immunodeficiencies, most of which are acquired [8]. Indeed, the risk of developing IA is highest among patients with hematological malignancies, recipients of hematopoietic stem cells (HSCT) and solid organ transplants (SOT) recipients. Racial minorities suffer from hurdles accessing healthcare, including accessing solid and hematopoietic transplants [75,76]; therefore, there may be a hypothetical increase in the incidence of IA among the white population who receive these procedures more often. For example, a retrospective study of a transplant registry found that black patients were less likely to receive heart transplant than white patients (aHR 0.87, 95% CI 0.84 to 0.90) and had a higher risk of post-transplant death (aHR 1.14, 95% CI 1.04 to 1.24) [75]. Similarly, black or African Americans experience a longer time on the renal transplant waiting list [77] and are less likely to complete a kidney transplant compared to white Americans [78,79]. However, most studies evaluated the epidemiology of IA in immunosuppressed patients showed either a minor increase in the incidence of IA among the black or African American population (44.6 in black or African American versus 42.9 in white populations per 1 million persons) [80] or no association with propensity score matching [81], which signals the lack of evidence of race association and IA in high risk immunosuppressed patients.

Taking underlying anatomical pathologies as risk for aspergillosis, there may be an association of such diseases with certain hereditary and pathological diseases, one of those diseases is cystic fibrosis (CF), which is highly linked to the white population [82]. This can be seen in the finding that white CF patients have higher risk for persistent *Aspergillus* spp. colonization (OR 1.74, 95% CI 1.23 to 2.48,  $p = 0.002$ ) than black or African American CF patients [83]. Such findings could be related to worse CF disease in white CF patients than in black or African American CF patients. In contrast, allergic fungal sinusitis, which can be caused by *Aspergillus* spp., has a higher incidence in the southern regions of the US, especially among black or African American compared to white populations living in these regions [84], which signals environmental and possibly socioeconomic factors related to the development of this disease.

Climatic factors were suggested to influence IA incidence rates among HSCT patients. This hypothesis was tested in a study of IA from large transplant centers in Seattle, Washington and Houston, Texas, which showed increased incidence rates of IA during summer months among HSCT in Seattle than in non-summer months. These findings were likely due to the higher burden of *Aspergillus* spp. spores in the air during the drier warm season following the rainy seasons, but such finding was not visible in the Houston center's cohort [73]. While findings that certain regions in the US, especially the western states, have a higher incidences of IA [80],



there was no statistical difference in the incidence of IA in different parts of the US after implementing propensity matching [81]. However, those studies did not evaluate seasonal differences. The association of seasonal effect and IA incidence should be further studied, especially as climate change may accentuate such regional and seasonal differences related to IA incidences and could place certain racial groups at a higher risk for IA versus others.

Lastly, azole-resistant *Aspergillus* spp. is an emerging pathogen that is linked to the use of agricultural azoles (tebuconazole and propiconazole) has been reported in different parts of the world. The incidence of such azole-resistant *Aspergillus* spp. in the US remains low, but it was reported from crop debris in the southeast regions of the US, with isolates carrying TR<sub>46</sub>/Y121F/T289A mutations that are significantly linked to azole resistance [74]. Such environmental presence of azole-resistant *Aspergillus* spp. in places where low socioeconomic populations live, including racial minorities, places those individuals at risk of acquiring invasive disease that is difficult to treat.

**Mucormycosis and other rare molds.** While mucormycosis occurs worldwide [85], the vast majority of cases are reported from India and neighboring regions, where there is limited racial disparity [86,87]. In India, a steep increase of mucormycosis cases was observed during the COVID-19 pandemic [88,89], driven by specific immunological mechanisms that predispose COVID-19 patients to mucormycosis [87], as well as overuse of systemic corticosteroids and an increase in the population with undiagnosed or uncontrolled diabetes [88]. Outbreaks of mucormycosis outside of India are often associated with natural disasters [90] such as hurricanes [91,92], tsunamis [91], or floodings [93], primarily affecting socially disadvantaged populations living in affected areas. For example, after 1 tornado in Missouri, US in 2011, 13/13 cases of necrotizing cutaneous mucormycosis occurred in white individuals [92]. Other outbreaks of mucormycosis have been associated with contaminated hospital products such as linen or a wooden spatula [94,95]. Race was not a factor reported in the vast majority of these outbreak descriptions. Among transplant recipients in the US who developed mucormycosis, white race was predominant (90.5%) [96], while other large epidemiological studies from the US failed to report on racial distribution [97].

Prevalence of other rare mold infections such as fusariosis, lomentosporiosis, scedosporiosis, and phaeohyphomycosis vary between geographical regions. For example, lomentosporiosis occurs primarily in Australia, Southwestern Europe, and Southwestern US [98]. Unfortunately, the majority of the larger studies, whether reporting cases from around the world [99–102] or from specific geographical regions [103–105], fails to report race and ethnicity of its participants. Larger outbreaks in the US were often associated with contaminated hospital products, such as an *Exserohilum rostratum* outbreak in patients receiving contaminated methylprednisolone injections [106]. Among 65 cases of invasive fusariosis in the US and Canada, 78.5% were white, 9.2% Asian, 6.2% black, and 4.6% Hispanic ethnicity [107]. Among 99 cases of phaeohyphomycosis (62 from the US, 7 from Australia, and 7 from Peru), 68% identified as white, 14% Hispanic/Latino, 8% Asian, and 7% black; the proportion of phaeohyphomycosis cases who were white further increased in the subgroup of disseminated disease (77%), while Hispanic/Latino cases represented 28% of those with local-superficial disease [108]. Among transplant recipients in the US, the vast majority developing fusariosis (94.4%) or scedosporiosis (91.3%) were white [96].

**Yeast. *Candida* infections.** *Candida* species can cause invasive infections in humans, including bloodstream infection or deep-seated infection, or a non-invasive disease mainly involving mucocutaneous infections [109]. Several *Candida* species are identified as a cause of infections in humans and animals, with the most commonly identified organisms including *C. albicans*, *C. glabrata*, *C. krusei*, *C. tropicalis*, *C. parapsilosis*, and *C. kefyr*. The epidemiology of different infections varies from hospital-related infections—in the cases of invasive disease—to

non-invasive infections that can affect non-hospitalized patients, such as with mucocutaneous candidiasis [109,110].

Several risk factors are related to invasive candidiasis, such as immunosuppression and surgical procedures [109]. In a study of candidemia in 4 US states from 2012 to 2016, black or African American individuals had higher rates of invasive candidiasis compared to those who didn't identify as black or African American (rate 2.3 (95% CI: 2.1 to 2.6) [111]. While such findings can be confounded by regional racial distribution, this risk was adjusted to the geographical location, which included sites from Georgia and Maryland that had a black or African American population of around 40%, and sites from Oregon and Tennessee, with a black or African American population less than 10% [111]. A similar finding from another study evaluating the burden of candidemia in the US, included data from 9 US states. It found that although overall rates of candidemia across these sites were 7.0 cases per 100,000 persons, the highest rates were in black or African American individuals (12.3 cases per 100,000 persons), with about a quarter of all cases in black or African American individuals [112]. Other similar findings were reported in an observational study that found that racial minority groups had a higher risk for *Candida* endophthalmitis than white patients (OR 1.65, 95% CI 1.07 to 2.55) [113]. Possible factors for the high incidence rate of candidemia in black or African American individuals include factors related to socioeconomic status, underlying medical conditions, and healthcare access [111]. Besides rates of invasive candidiasis associated with certain racial minorities, selection of certain *Candida* spp. may be associated with race groups, as reported among transplant patients with invasive candidiasis, black or African American individuals were noted to have a higher incidence compared to white individuals of *C. glabrata*; however, further studies are needed to confirm such observation and evaluate the mechanism of such risk [114].

In cases of non-invasive candidiasis, black or African American women were more likely (11.5%) to have colonization from *Candida* spp. compared to Hispanic (9.8%) or white women (8.5%) [115]. Black or African American women also had a 7-fold higher risk of having vulvovaginal candidiasis (VVC) than other racial groups among university students [116], in 1 study. A similar finding of a higher incidence of self-reported physician diagnosed VVC among black or African American women than among white women in a telephone survey study [117]. Inversely, white individuals with HIV had higher rates of oral candidiasis compared to black or African American men [118].

Overall, such race and candidiasis relationships are presented in an epidemiological manner that does not explain the pathology behind such association, and the likelihood of confounding factors related to healthcare access and socioeconomic status is very high.

**Cryptococcosis.** *Cryptococcus neoformans* and *Cryptococcus gattii* are 2 species complexes that are the etiological agents of nearly all human and animal cryptococcosis [119]. Separation of strains using molecular markers into various serotypes, varieties, and groups reveal that *C. gattii* is an etiological agent of cryptococcosis in immunocompromised individuals status post organ transplantation, rheumatic immune diseases, diabetes mellitus, and malignancies as well as in healthy individuals [120]. *C. gattii* affects HIV-uninfected persons in tropical and subtropical regions while *C. neoformans* primarily affects persons with HIV infection worldwide [121]. The epidemiology of cryptococcosis changed significantly with the rise and fall of the AIDS pandemic and emergence of various pathogenic *Cryptococcus* spp. since the 1980s.

Human hosts are infected following the inhalation of spores that subsequently invade pulmonary alveoli, causing pulmonary diseases, or that disseminate through the bloodstream, often leading to fatal meningitis [122–124]. Cryptococcal meningitis (CM) associated with HIV infection is one of the leading opportunistic infections [125], and mortality from cryptococcosis ranges from 8% to 50% [126]. There has been an increasing interest in *C. gattii*

infections over the past 2 decades due to the emergence of *C. gattii* in the Pacific Northwest region of the US. In July 2010, 60 human cases were reported to the Centers for Disease Control and Prevention (CDC) from 4 states (California, Idaho, Oregon, and Washington) in the Pacific Northwest [127].

In an analysis of deaths from cryptococcosis among individuals living with HIV infection in the US from 1999 to 2016, with respect to race, there were 199 deaths from cryptococcosis among women with HIV infection, 38 deaths among non-Hispanic white individuals, and 161 among black or African American individuals. Non-Hispanic white individuals had significantly lower mortality rates than black or African American individuals, with a mortality rate in black or African American men of 0.19 (95% CI 0.17 to 0.21) and 0.06 in black or African American women (95% CI 0.05 to 0.06). The mortality rate in white men and women was  $<0.001$  [128]. In a single center, retrospective study of individuals with cryptococcosis admitted from October 2005 to October 2017 [129], of 114 patients admitted to the University of Kentucky HealthCare Medical Center, males made up 74.6% (85/114) of patients and 91.2% (104/114) were white. Cryptococcosis in Hispanic persons and black or African American persons was more common in the HIV-infected group compared to the transplant and non-HIV/non-transplant (NHNT) groups ( $p < 0.0001$ ). Among HIV-infected persons in a US survey, the incidence of cryptococcosis in 1993 was significantly higher among black or African American persons (31/1,000) than among white persons (23/1,000; relative risk [RR] = 1.3, 95% CI, 1.1 to 1.6) [130]. In another study [131] investigating the prevalence of undiagnosed cryptococcal infection among HIV-infected person in the US from 1986 to 2012, stored sera from 1,872 participants in the Multicenter AIDS Cohort Study and the Women's Interagency HIV Study were screened. Of those specimens, the overall presence of cryptococcal antigen (CrAg) positivity was 2.9%, with no significant differences observed in the proportion of CrAg-positive specimens by race and ethnicity, except in persons of "other" ethnicity (i.e., not white (2.5%), black (2.5%), or Hispanic (1.7%)) had a prevalence of 6.4% (CI = 3.9% to 10.3%).

**Endemic mycoses in the United States. *Coccidioidomycosis.*** *Coccidioides* spp. (*C. immitis* and *C. posadasii*) is a dimorphic fungus endemic to the southwestern US. It grows in the environment in the mycelial form, and the yeast form infects the animal host after inhalation and leads to coccidioidomycosis [132,133]. Most people who get infected do not develop symptoms, and only a small minority, about 1%, may develop disseminated disease [134]. However, it is thought that around 25% of all community-acquired pneumonia in endemic regions is secondary to coccidioidomycosis [135].

Several epidemiological studies reported higher incidence rates of coccidioidomycosis among racial and ethnic minorities in the US endemic regions [136–138]. This was shown in a recent CDC study using data of reportable endemic mycoses from 26 states that found that American Indian/Alaska Native (AI/AN) cases and Hispanic cases had higher incidence rates of coccidioidomycosis (17.4 and 11.2 per 100,000, respectively) compared to non-Hispanic white cases (4.1 per 100,000). However, data on race and ethnicity were available in less than half (39%) of the reported cases [138]. In addition, geography and regional exposure to dust might have influenced coccidioidomycosis rates in different racial and ethnic groups. Such a hypothesis was explored in coccidioidomycosis surveillance in California (1973 to 2011) that showed the increase in the incidence of coccidioidomycosis followed different environmental exposures, including occupational exposures such as construction and agriculture, regardless of the population's racial and ethnic groups [139]. Such geographically related trends can vary based on regional analysis, as the Hispanic population had a much higher incidence than white populations in areas such as San Joaquin Valley [140], which may be associated with the type of occupation and outdoor recreational activities among different racial and ethnic groups.



Moreover, high levels of particulate matter with diameters less than 10 micrometers (PM<sub>10</sub>) in certain parts of Arizona have been associated with an increased risk of coccidioidomycosis, and such regional high PM<sub>10</sub> exposure is more likely to affect black or African American and Hispanic populations [141]. Another factor to account for is the knowledge gaps among Hispanic farm workers about coccidioidomycosis [142] that can make recognizing the disease and providing early treatment challenging. Moreover, while black or African American inmates in California had higher rates of symptomatic coccidioidomycosis than white inmates [143,144], a study using skin tests to screen for coccidioidomycosis showed no association between coccidioidomycosis and race [142]. However, in the latter study the number of inmates who agreed to the skin test was smaller among minority racial and ethnic groups compared to white inmates. Thus, the association between racial and ethnic groups and the acquisition of coccidioidomycosis are likely related to socioeconomic and health disparities factors, which are likely to influence the incidence rates in these populations.

These factors should be taken into account as we learn that climate change will likely influence the spread of coccidioidomycosis endemicity to different geographic regions. Such environmental spread may, in turn, expose certain racial or ethnic groups more than others to this infection [133,145]. Moreover, environmental injustices, in which poor communities and communities of color are disproportionately exposed to environmental harms yet environmental protections are limited [146], could further contribute to higher rates of coccidioidomycosis among racial and ethnic groups.

Older age, diabetes mellitus, and immunosuppression are some of the risk factors for developing severe and disseminated coccidioidomycosis [147]. It was observed that certain racial and ethnic groups were more likely to develop severe and disseminated coccidioidomycosis, such as Asians (especially Filipinos), and black or African Americans were reported to be at increased risk for coccidioidomycosis complications [148–150]. AI/AN was reported to have an increased risk of coccidioidomycosis complications, but among this population, case fatality rates were shown to have trended down between 1959 and 1980, with unchanged coccidioidomycosis incidence rate over the same period, which may be explained by the change in the social, economic, environmental and the availability of new therapies for coccidioidomycosis during that time period [151].

Black or African American and Filipino individuals were reported to be at a higher risk compared with white individuals of hospitalization from pulmonary coccidioidomycosis [152], with several reports alluding that black or African American individuals have the highest associated mortality, dissemination, and hospitalizations, with odds of disseminated disease as high as 5 to 10 times the rates seen among the white individuals [137,152–155] and this increased risk persisted after controlling for income [156]. Among the immunocompromised patients, the risk of symptomatic coccidioidomycosis rates shown to be higher among black or African American individuals with HIV infection compared to white individuals [157], but this relationship was not seen in the renal transplant recipients with coccidioidomycosis [158]. This could be secondary to different populations' underlying immunocompromising conditions and other factors related to socioeconomic status and health disparity of those 2 populations that likely confounded the relationship. Also, black or African American individuals with coccidioidomycosis were found to have lower rates compared to white individuals of erythema nodosum, which is an immunological response to the infection that is thought to be protective against coccidioidomycosis [159,160], which may hint at the higher rates of disseminated and severe disease in this population.

In conclusion, it is not well established if genetic predispositions are the main driver of increased risk of coccidioidomycosis and certain racial and ethnic groups, although there is a clear increased risk of severe coccidioidomycosis infection in certain racial or ethnic groups,

such as Filipinos and black or African Americans. Factors such as socioeconomic status, high inoculum exposure, and healthcare access with delay in the diagnosis may contribute to this increase in disease severity, along with predisposing genetic factors, as previously noted.

**Histoplasmosis.** *Histoplasma capsulatum* is a dimorphic fungus with at least 4 cryptic species. *Histoplasma capsulatum sensu stricto* is endemic to Panama and the northern portion of South America [161] while *Histoplasma suramericanum* is distributed widely across South America. *Histoplasma mississippiense* is distributed in the Mississippi River Valley and *Histoplasma ohiense* in the Ohio River Valley, both in the US [162]. Locally acquired infections outside these areas in the US have been reported, showing that the geographic range of histoplasmosis in the US is wider than is often appreciated [163].

Following the inhalation of spores of the soil-dwelling dimorphic *Histoplasma* spp., only a minority of individuals develop symptomatic disease [164]. In 2019, the CDC received 1,124 case reports of histoplasmosis from 12 states where it is a reportable disease. The overall incidence of histoplasmosis in these states was 1.8 cases per 100,000 population, including Illinois (292 cases (26%), rate: 2.3 cases per 100,000 persons), Michigan (225 cases (20%), rate 2.3 cases per 100,000 persons), and Minnesota (214 cases (19%), rate 3.8 cases per 100,000 persons). These 3 states accounted for a combined 65% of these cases [138].

Occupational exposures are frequently implicated in histoplasmosis outbreaks. Early in the HIV pandemic, reports of *Histoplasma* spp. outbreaks [164–166] demonstrated an increased risk of death associated with advanced AIDS (CD4 counts <75 mm<sup>3</sup>), immunocompromised states (such as solid organ transplantation), chronic renal disease, and prolonged use of corticosteroids or tumor necrosis factor (TNF) antagonists [164,166,167].

From 2011 to 2014, a total of 3,409 histoplasmosis cases were reported from 12 states where histoplasmosis is reportable. Of the 1,729 patients in 8 states that contributed race data, 1,079 (62%) were white, 446 (26%) were of unknown race, and 166 (10%) were black. Of the 1,620 patients in these 8 states for whom ethnicity data were available, 1,072 (66%) were non-Hispanic or Latino, 503 (31%) were of unknown ethnicity, and 45 (3%) were Hispanic or Latino. Mortality data was available for 1,142 patients, of which 76 (7%) died [168]. In the 2019 survey, of 1,124 cases, there was data on race and ethnicity in 859 (76%) of cases. Of these cases, 656 (76%) of cases occurred in white persons, with incidence highest in white persons (1.3 per 100,000 population), AI/AN (1.2), and Hispanic persons (1.2). Of those which hospital data was available for (460 cases), 249 (54%) persons were hospitalized, and 20 (5%) persons died. In this survey, histoplasmosis incidence was similar across racial and ethnic categories (range: 0.9 to 1.3) [138].

Although anyone can acquire histoplasmosis in areas where *Histoplasma* spp. is present in the environment, persons living with advanced HIV are at a particularly high risk for developing histoplasmosis. Clinical signs and symptoms of this disease are often nonspecific, making it difficult to establish a diagnosis unless the index of suspicion is high. Complications of disseminated histoplasmosis, including adrenal insufficiency, endovascular infection, meningitis, and hemophagocytic lymph histiocytosis, are uncommon but challenging to manage [169].

**Blastomycosis.** Blastomycosis is an uncommon but underdiagnosed and potentially life-threatening infection caused by the dimorphic fungi *Blastomyces dermatitidis*, which includes at least 1 cryptic subspecies, *B. gilchristii* [170]. These organisms live in warm, moist soil with plentiful organic matter. It is endemic throughout much of the midwestern US [171,172], particularly along the Great Lakes and the Mississippi, Ohio, and Saint Lawrence River valleys [173,174]. The region of geographic risk for blastomycosis is incompletely understood for multiple reasons, including the difficulty pinpointing the time of exposure in some patients who have a long clinical latency period, the absence of a skin test or other well-known marker of prior exposure, and lack of instances in which *Blastomyces* spp. have been recovered from the

environment. A survey of 240 case reports of blastomycosis from 5 states (Arkansas, Louisiana, Michigan, Minnesota, and Wisconsin) in 2019 showed that the overall blastomycosis incidence in these states was 0.8 cases per 100,000 population, with Minnesota (rate 1.4) and Wisconsin (rate 1.7) accounting for 179 (75%) of the total cases [138]. Endemicity is most pronounced in the hyperendemic regions of north central Wisconsin where the disease incidence can exceed 100 cases per 100,000 inhabitants [175]. The geographic range appears to be shifting, with new regions at risk including New York state [172].

Blastomycosis mainly affects immunocompetent persons, although immunocompromised persons are more likely to develop more severe forms of the disease [176]. In a survey reporting 4,441 blastomycosis cases in 5 US states from 1987 to 2018, 2,778 (64%) occurred in white persons, 740 (17%) in persons of unknown race, 406 (9%) in black or African American persons, and 193 (5%) in Asian, Native Hawaiian, or other Pacific Islander persons. The majority of persons, 2,828 (71%), did not identify as Hispanic or Latino and ethnicity was unknown for 1,015 (26%) persons [173]. A study in central and northern Wisconsin found that while 90% of blastomycosis cases in non-Hispanic white persons were caused by *B. dermatitidis*, *B. gilchristii* frequently caused infection in Hispanic white, AI/AN, and Asian persons.

Furthermore, while non-Hispanic white persons were frequently older and had more underlying medical conditions compared to Hispanic white and Asian persons, the odds of hospitalization were 2 to 3 times higher for Hispanic white, AI/AN, and Asian persons [177]. In another study of persons admitted to the University of Mississippi Medical Center and treated for blastomycosis from 1980 to 2000, there was a clear predominance of black or African American men admitted to the hospital, followed by black or African American women. Among the 123 hospitalized persons, 100 (81%) were black or African American, 21 (17%) white, and 2 (2%) Native American. White females were least likely to be hospitalized with blastomycosis in this study [178]. The increased risk for hospitalization among racial and ethnic minorities may signify blastomycosis-related health disparities [178–180]. Differences in genetic composition have been postulated to underlie ethnic disparities in incidence rates of this endemic blastomycosis [36], including one study showing case clustering among persons of Hmong ethnicity [171].

## Conclusion

Although now largely understood as a more social than biologic construct, racial and ethnic identity may impact risk for acquiring infectious diseases, including fungal infections. Risk factors for fungal infections may include genetic and immunologic risk factors such as aberrations in host immune response, host polymorphisms, and epigenomic factors that may stem from underlying social determinants of health. In addition, social determinants of health and underlying socioeconomic factors may increase risk for fungal infections as certain racial and ethnic groups may be predisposed to diseases that increase risk for fungal infections, as well as disparities in healthcare access and health insurance (Fig 1). In this review, we analyzed race and ethnicity as risk factors for acquiring fungal infections as well as race and ethnicity as they relate to risk for severe disease from fungal infections.

Risk factors for aspergillosis and other invasive mold infections largely appear related to environmental differences and underlying social determinants of health, although immunologic aberrations and genetic polymorphisms may play a role in some circumstances, such as defects in the CARD9 pathway and polymorphisms such as with IL-1, IL-10, IL-15, IL-23, TNF- $\alpha$ , and INF- $\gamma$ . Conversely, although black or African American individuals appear to be at a higher risk compared to white individuals for superficial and invasive *Candida* infections as well as cryptococcosis, the reasons for this are unclear from an immunologic/genetic

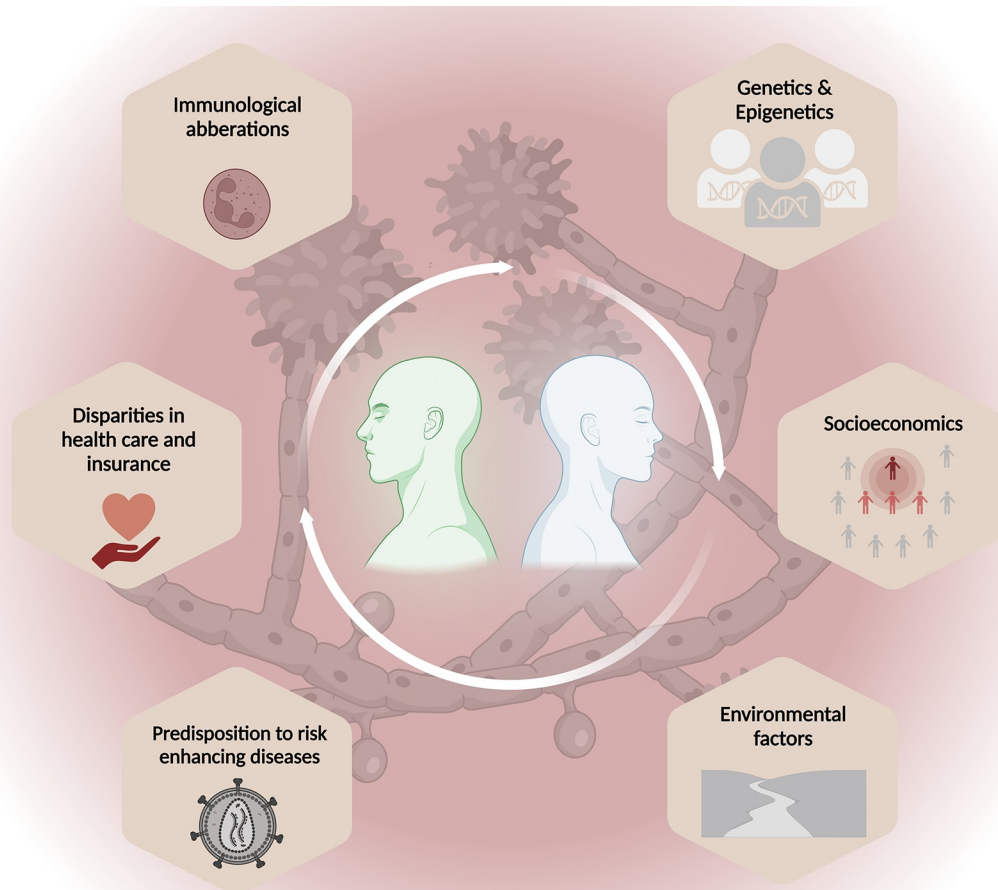

**Fig 1. Factors that may explain differences in racial and ethnic distribution in fungal diseases.** The figure was created with [BioRender.com](https://www.biorender.com/).

<https://doi.org/10.1371/journal.ppat.1011025.g001>

standpoint, and may therefore be rather related to underlying social determinants of health, access to healthcare, and other socioeconomic disparities.

Native American/American Indian and Hispanic/Latino populations are at a higher risk compared to white populations of coccidioidomycosis infection, although it is likely that this is at least partially related to occupational and environmental exposure, as individuals in these populations are more likely to engage in outdoor occupation that puts them at risk for coccidioidomycosis and also reside in areas where coccidioidomycosis is endemic. Certain populations, such as Filipinos and black or African American populations, are at increased risk compared to white populations for severe or disseminated coccidioidomycosis. The exact reason for this risk is unclear, but several immunologic mechanisms may contribute to the occurrence of more severe disease, such as the presence of HLA-A9 and HLA-B9 antigens, ABO blood type B, HLA class II-DRB1\*1301 allele.

Data on race and ethnicity for histoplasmosis and blastomycosis are further complicated based on their geographic distribution and the fact that neither of these diseases is nationally reportable. As with the other fungi, risk factors for severe disease may be related to underlying social determinants of health, socioeconomic, and health disparities. Underlying immunologic mechanisms may contribute as well, such as polymorphisms in IL-6 that have been observed to be overrepresented in the Hmong population and been postulated risk factor for blastomycosis infection in this population [36].

Attributing disease risk to genetic factors across racial and ethnic groups is fraught considering the large genetic variability within these populations, although as previously mentioned, there may be specific genetic and immunologic factors that predispose individuals within populations to infection or severe disease. For most fungal diseases, other factors that may affect certain racial or ethnic groups more than others, such as environmental exposures and differences in underlying social determinants of health may explain differences observed in epidemiology and disease severity. Further investigation is necessary to elucidate epigenetic changes due to psychosocial stressors, environmental exposures, or other underlying social determinants of health as a risk factor for fungal infections.

## References

1. Egger M, Hoenigl M, Thompson GR 3rd, Carvalho A, Jenks JD. Let's talk about sex characteristics-As a risk factor for invasive fungal diseases. *Mycoses*. 2022; 65(6):599–612. <https://doi.org/10.1111/myc.13449> PMID: 35484713
2. Shih M, Bonam C, Sanchez D, Peck C. The social construction of race: biracial identity and vulnerability to stereotypes. *Cultur Divers Ethnic Minor Psychol*. 2007; 13(2):125–133. <https://doi.org/10.1037/1099-9809.13.2.125> PMID: 17500601
3. Smedley A, Smedley BD. Race as biology is fiction, racism as a social problem is real: Anthropological and historical perspectives on the social construction of race. *Am Psychol*. 2005; 60(1):16–26. <https://doi.org/10.1037/0003-066X.60.1.16> PMID: 15641918
4. Brawley OW. Prostate cancer and the social construct of race. *Cancer*. 2021; 127(9):1374–1376. <https://doi.org/10.1002/cncr.33417> PMID: 33721331
5. Flanagin A, Frey T, Christiansen SL. Updated Guidance on the Reporting of Race and Ethnicity in Medical and Science Journals. *JAMA*. 2021; 326(7):621–627. <https://doi.org/10.1001/jama.2021.13304> PMID: 34402850
6. Lewontin RC. The Apportionment of Human Diversity. In: Dobzhansky T, Hecht MK, Steere WC, editors. *Evolutionary Biology*. New York, NY: Springer; 1972.
7. Yudell M, Roberts D, DeSalle R, Tishkoff S. Science and Society. Taking race out of human genetics. *Science*. 2016; 351(6273):564–5. <https://doi.org/10.1126/science.aac4951> PMID: 26912690
8. Thompson GR 3rd, Young JH. Aspergillus Infections. *N Engl J Med*. 2021; 385(16):1496–1509. <https://doi.org/10.1056/NEJMra2027424> PMID: 34644473
9. Romani L. Immunity to fungal infections. *Nat Rev Immunol*. 2011; 11(4):275–288. <https://doi.org/10.1038/nri2939> PMID: 21394104
10. Lionakis MS. Genetic variation and fungal infection risk: State of the art. *Curr Fungal Infect Rep*. 2019; 13(4):250–259. <https://doi.org/10.1007/s12281-019-00362-6> PMID: 32523645
11. Kesh S, Mensah NY, Peterlongo P, Jaffe D, Hsu K, VAN DEN Brink M, et al. TLR1 and TLR6 polymorphisms are associated with susceptibility to invasive aspergillosis after allogeneic stem cell transplantation. *Ann N Y Acad Sci*. 2005; 1062:95–103. <https://doi.org/10.1196/annals.1358.012> PMID: 16461792
12. Bochud PY, Chien JW, Marr KA, Leisenring WM, Upton A, Janer M, et al. Toll-like receptor 4 polymorphisms and aspergillosis in stem-cell transplantation. *N Engl J Med*. 2008; 359(17):1766–1777. <https://doi.org/10.1056/NEJMoa0802629> PMID: 18946062
13. Carvalho A, Cunha C, Carotti A, Aloisi T, Guarrera O, Di Ianni M, et al. Polymorphisms in Toll-like receptor genes and susceptibility to infections in allogeneic stem cell transplantation. *Exp Hematol*. 2009; 37(9):1022–1029. <https://doi.org/10.1016/j.exphem.2009.06.004> PMID: 19539691
14. Carvalho A, Pasqualotto AC, Pitzurra L, Romani L, Denning DW, Rodrigues F. Polymorphisms in toll-like receptor genes and susceptibility to pulmonary aspergillosis. *J Infect Dis*. 2008; 197(4):618–621. <https://doi.org/10.1086/526500> PMID: 18275280
15. Van der Graaf CA, Netea MG, Morre SA, Den Heijer M, Verweij PE, Van der Meer JW, et al. Toll-like receptor 4 Asp299Gly/Thr399Ile polymorphisms are a risk factor for *Candida* bloodstream infection. *Eur Cytokine Netw*. 2006; 17(1):29–34. PMID: 16613760
16. Ferwerda B, Ferwerda G, Plantinga TS, Willment JA, van Spruel AB, Venselaar H, et al. Human dectin-1 deficiency and mucocutaneous fungal infections. *N Engl J Med*. 2009; 361(18):1760–1767. <https://doi.org/10.1056/NEJMoa0901053> PMID: 19864674
17. Cunha C, Di Ianni M, Bozza S, Giovannini G, Zagarella S, Zelante T, et al. Dectin-1 Y238X polymorphism associates with susceptibility to invasive aspergillosis in hematopoietic transplantation through



- impairment of both recipient- and donor-dependent mechanisms of antifungal immunity. *Blood*. 2010; 116(24):5394–5402. <https://doi.org/10.1182/blood-2010-04-279307> PMID: 20807886
18. Plantinga TS, van der Velden WJ, Ferwerda B, van Spruel AB, Adema G, Feuth T, et al. Early stop polymorphism in human DECTIN-1 is associated with increased candida colonization in hematopoietic stem cell transplant recipients. *Clin Infect Dis*. 2009; 49(5):724–732. <https://doi.org/10.1086/604714> PMID: 19614557
  19. Granell M, Urbano-Ispizua A, Suarez B, Rovira M, Fernandez-Aviles F, Martinez C, et al. Mannan-binding lectin pathway deficiencies and invasive fungal infections following allogeneic stem cell transplantation. *Exp Hematol*. 2006; 34(10):1435–1441. <https://doi.org/10.1016/j.exphem.2006.06.005> PMID: 16982337
  20. Donders GG, Babula O, Bellen G, Linhares IM, Witkin SS. Mannose-binding lectin gene polymorphism and resistance to therapy in women with recurrent vulvovaginal candidiasis. *BJOG*. 2008; 115(10):1225–1231. <https://doi.org/10.1111/j.1471-0528.2008.01830.x> PMID: 18715406
  21. Kaur S, Gupta VK, Shah A, Thiel S, Sarma PU, Madan T. Elevated levels of mannan-binding lectin [corrected] (MBL) and eosinophilia in patients of bronchial asthma with allergic rhinitis and allergic bronchopulmonary aspergillosis associate with a novel intronic polymorphism in MBL. *Clin Exp Immunol*. 2006; 143(3):414–419. <https://doi.org/10.1111/j.1365-2249.2006.03007.x> PMID: 16487239
  22. Bao F, Fu X, Yu G, Wang Z, Liu H, Zhang F. Mannose-Binding Lectin and Mannose-Binding Lectin-Associated Serine Protease-2 Genotypes and Serum Levels in Patients with Sporotrichosis. *Am J Trop Med Hyg*. 2019; 101(6):1322–1324. <https://doi.org/10.4269/ajtmh.19-0470> PMID: 31549610
  23. Cunha C, Aversa F, Lacerda JF, Busca A, Kurzai O, Grube M, et al. Genetic PTX3 deficiency and aspergillosis in stem-cell transplantation. *N Engl J Med*. 2014; 370(5):421–432. <https://doi.org/10.1056/NEJMoa1211161> PMID: 24476432
  24. Fisher CE, Hohl TM, Fan W, Storer BE, Levine DM, Zhao LP, et al. Validation of single nucleotide polymorphisms in invasive aspergillosis following hematopoietic cell transplantation. *Blood*. 2017; 129(19):2693–2701. <https://doi.org/10.1182/blood-2016-10-743294> PMID: 28270451
  25. Vedula RS, Cheng MP, Ronayne CE, Farmakiotis D, Ho VT, Koo S, et al. Somatic GATA2 mutations define a subgroup of myeloid malignancy patients at high risk for invasive fungal disease. *Blood Adv*. 2021; 5(1):54–60. <https://doi.org/10.1182/bloodadvances.2020002854> PMID: 33570623
  26. Feldman MB, Dutko RA, Wood MA, Ward RA, Leung HM, Snow RF, et al. *Aspergillus fumigatus* Cell Wall Promotes Apical Airway Epithelial Recruitment of Human Neutrophils. *Infect Immun*. 2020; 88(2).
  27. Mezger M, Steffens M, Beyer M, Manger C, Eberle J, Toliat MR, et al. Polymorphisms in the chemokine (C-X-C motif) ligand 10 are associated with invasive aspergillosis after allogeneic stem-cell transplantation and influence CXCL10 expression in monocyte-derived dendritic cells. *Blood*. 2008; 111(2):534–536. <https://doi.org/10.1182/blood-2007-05-090928> PMID: 17957030
  28. Glocker EO, Hennigs A, Nabavi M, Schaffer AA, Woellner C, Salzer U, et al. A homozygous CARD9 mutation in a family with susceptibility to fungal infections. *N Engl J Med*. 2009; 361(18):1727–1735. <https://doi.org/10.1056/NEJMoa0810719> PMID: 19864672
  29. Rieber N, Gazendam RP, Freeman AF, Hsu AP, Collar AL, Sugui JA, et al. Extrapulmonary Aspergillus infection in patients with CARD9 deficiency. *JCI Insight*. 2016; 1(17):e89890. <https://doi.org/10.1172/jci.insight.89890> PMID: 27777981
  30. Sainz J, Perez E, Gomez-Lopera S, Jurado M. IL1 gene cluster polymorphisms and its haplotypes may predict the risk to develop invasive pulmonary aspergillosis and modulate C-reactive protein level. *J Clin Immunol*. 2008; 28(5):473–485. <https://doi.org/10.1007/s10875-008-9197-0> PMID: 18484169
  31. Brouard J, Knauer N, Boelle PY, Corvol H, Henrion-Caude A, Flamant C, et al. Influence of interleukin-10 on *Aspergillus fumigatus* infection in patients with cystic fibrosis. *J Infect Dis*. 2005; 191(11):1988–1991. <https://doi.org/10.1086/429964> PMID: 15871134
  32. Sambatakou H, Pravica V, Hutchinson IV, Denning DW. Cytokine profiling of pulmonary aspergillosis. *Int J Immunogenet*. 2006; 33(4):297–302. <https://doi.org/10.1111/j.1744-313X.2006.00616.x> PMID: 16893395
  33. Choi EH, Foster CB, Taylor JG, Erichsen HC, Chen RA, Walsh TJ, et al. Association between chronic disseminated candidiasis in adult acute leukemia and common IL4 promoter haplotypes. *J Infect Dis*. 2003; 187(7):1153–1156. <https://doi.org/10.1086/368345> PMID: 12660931
  34. Babula O, Lazdane G, Kroica J, Linhares IM, Ledger WJ, Witkin SS. Frequency of interleukin-4 (IL-4)-589 gene polymorphism and vaginal concentrations of IL-4, nitric oxide, and mannose-binding lectin in women with recurrent vulvovaginal candidiasis. *Clin Infect Dis*. 2005; 40(9):1258–1262. <https://doi.org/10.1086/429246> PMID: 15825027

35. Bozzi A, Reis BS, Pereira PP, Pedrosa EP, Goes AM. Interferon-gamma and interleukin-4 single nucleotide gene polymorphisms in Paracoccidioidomycosis. *Cytokine*. 2009; 48(3):212–217. <https://doi.org/10.1016/j.cyto.2009.07.011> PMID: 19682920
36. Merkhofer RM Jr, O'Neill MB, Xiong D, Hernandez-Santos N, Dobson H, Fites JS, et al. Investigation of Genetic Susceptibility to Blastomycosis Reveals Interleukin-6 as a Potential Susceptibility Locus. *MBio*. 2019; 10(3). <https://doi.org/10.1128/mBio.01224-19> PMID: 31213563
37. Sainz J, Salas-Alvarado I, Lopez-Fernandez E, Olmedo C, Comino A, Garcia F, et al. TNFR1 mRNA expression level and TNFR1 gene polymorphisms are predictive markers for susceptibility to develop invasive pulmonary aspergillosis. *Int J Immunopathol Pharmacol*. 2010; 23(2):423–436. <https://doi.org/10.1177/039463201002300205> PMID: 20646338
38. Sainz J, Perez E, Hassan L, Moratalla A, Romero A, Collado MD, et al. Variable number of tandem repeats of TNF receptor type 2 promoter as genetic biomarker of susceptibility to develop invasive pulmonary aspergillosis. *Hum Immunol*. 2007; 68(1):41–50. <https://doi.org/10.1016/j.humimm.2006.10.011> PMID: 17207711
39. Lupianez CB, Canet LM, Carvalho A, Alcazar-Fuoli L, Springer J, Lackner M, et al. Polymorphisms in Host Immunity-Modulating Genes and Risk of Invasive Aspergillosis: Results from the AspBIOmics Consortium. *Infect Immun*. 2015; 84(3):643–657. <https://doi.org/10.1128/IAI.01359-15> PMID: 26667837
40. Guo J, Ning XQ, Ding JY, Zheng YQ, Shi NN, Wu FY, et al. Anti-IFN-gamma autoantibodies underlie disseminated *Talaromyces marneffei* infections. *J Exp Med*. 2020; 217(12).
41. Leal SM Jr, Roy S, Vareechon C, Carrion S, Clark H, Lopez-Berges MS, et al. Targeting iron acquisition blocks infection with the fungal pathogens *Aspergillus fumigatus* and *Fusarium oxysporum*. *PLoS Pathog*. 2013; 9(7):e1003436.
42. Zaas AK, Liao G, Chien JW, Weinberg C, Shore D, Giles SS, et al. Plasminogen alleles influence susceptibility to invasive aspergillosis. *PLoS Genet*. 2008; 4(6):e1000101. <https://doi.org/10.1371/journal.pgen.1000101> PMID: 18566672
43. Hebart H, Bollinger C, Fisch P, Sarfati J, Meisner C, Baur M, et al. Analysis of T-cell responses to *Aspergillus fumigatus* antigens in healthy individuals and patients with hematologic malignancies. *Blood*. 2002; 100(13):4521–4528.
44. Cox RA, Magee DM. Coccidioidomycosis: host response and vaccine development. *Clin Microbiol Rev*. 2004; 17(4):804–839. <https://doi.org/10.1128/CMR.17.4.804-839.2004> PMID: 15489350
45. Ruddy BE, Mayer AP, Ko MG, Labonte HR, Borovansky JA, Boroff ES, et al. Coccidioidomycosis in African Americans. *Mayo Clin Proc*. 2011; 86(1):63–69. <https://doi.org/10.4065/mcp.2010.0423> PMID: 21193657
46. Louie L, Ng S, Hajjeh R, Johnson R, Vugia D, Werner SB, et al. Influence of host genetics on the severity of coccidioidomycosis. *Emerg Infect Dis*. 1999; 5(5):672–680. <https://doi.org/10.3201/eid0505.990508> PMID: 10511523
47. Breton CV, Landon R, Kahn LG, Enlow MB, Peterson AK, Bastain T, et al. Exploring the evidence for epigenetic regulation of environmental influences on child health across generations. *Commun Biol*. 2021; 4(1):769. <https://doi.org/10.1038/s42003-021-02316-6> PMID: 34158610
48. Zhang Q, Cao X. Epigenetic regulation of the innate immune response to infection. *Nat Rev Immunol*. 2019; 19(7):417–432. <https://doi.org/10.1038/s41577-019-0151-6> PMID: 30918351
49. Perkins DJ, Patel MC, Blanco JC, Vogel SN. Epigenetic Mechanisms Governing Innate Inflammatory Responses. *J Interferon Cytokine Res*. 2016; 36(7):454–461. <https://doi.org/10.1089/jir.2016.0003> PMID: 27379867
50. Centers for Disease Control and Prevention. Diagnosis of HIV Infection in the United States and dependent areas, 2019. HIV Surveillance Report. 2021:32.
51. Kirtane K, Lee SJ. Racial and ethnic disparities in hematologic malignancies. *Blood*. 2017; 130(15):1699–1705. <https://doi.org/10.1182/blood-2017-04-778225> PMID: 28724539
52. Conneely SE, McAtee CL, Gupta R, Lubega J, Scheurer ME, Rau RE. Association of race and ethnicity with clinical phenotype, genetics, and survival in pediatric acute myeloid leukemia. *Blood Adv*. 2021; 5(23):4992–5001. <https://doi.org/10.1182/bloodadvances.2021004735> PMID: 34619758
53. Karter AJ, Ferrara A, Liu JY, Moffet HH, Ackerson LM, Selby JV. Ethnic disparities in diabetic complications in an insured population. *JAMA*. 2002; 287(19):2519–2527. <https://doi.org/10.1001/jama.287.19.2519> PMID: 12020332
54. Lanting LC, Joung IM, Mackenbach JP, Lamberts SW, Bootsma AH. Ethnic differences in mortality, end-stage complications, and quality of care among diabetic patients: a review. *Diabetes Care*. 2005; 28(9):2280–2288. <https://doi.org/10.2337/diacare.28.9.2280> PMID: 16123507

55. Golden SH, Brown A, Cauley JA, Chin MH, Gary-Webb TL, Kim C, et al. Health disparities in endocrine disorders: biological, clinical, and nonclinical factors—an Endocrine Society scientific statement. *J Clin Endocrinol Metab.* 2012; 97(9):E1579–639. <https://doi.org/10.1210/jc.2012-2043> PMID: 22730516
56. Garcia L, Follis S, Thomson CA, Breathett K, Cené CW, Jimenez M, et al. Taking action to advance the study of race and ethnicity: the Women's Health Initiative (WHI). *Womens Midlife Health.* 2022; 8(1):1. <https://doi.org/10.1186/s40695-021-00071-6> PMID: 34983682
57. Centers for Disease Control and Prevention. Social Determinants of Health: Know What Affects Health. Accessed August 15, 2022. Available at: <https://www.cdc.gov/socialdeterminants/index.htm>.
58. Cho SWCK, McCall L. Toward a Field of Intersectionality Studies: Theory, Applications, and Praxis. *Signs.* 2013; 38(4):785–810.
59. Crenshaw K. Mapping the Margins: Intersectionality, Identity Politics, and Violence against Women of Color. *Stanford Law Rev.* 1991; 43(6):1241–1299.
60. Danielsen AC, Lee KM, Boulicault M, Rushovich T, Gompers A, Tarrant A, et al. Sex disparities in COVID-19 outcomes in the United States: Quantifying and contextualizing variation. *Soc Sci Med.* 2022; 294:114716. <https://doi.org/10.1016/j.socscimed.2022.114716> PMID: 35042136
61. Rushovich T, Boulicault M, Chen JT, Danielsen AC, Tarrant A, Richardson SS, et al. Sex Disparities in COVID-19 Mortality Vary Across US Racial Groups. *J Gen Intern Med.* 2021; 36(6):1696–1701. <https://doi.org/10.1007/s11606-021-06699-4> PMID: 33818679
62. Xian Z, Saxena A, Javed Z, Jordan JE, Alkarawi S, Khan SU, et al. COVID-19-related state-wise racial and ethnic disparities across the USA: an observational study based on publicly available data from The COVID Tracking Project. *BMJ Open.* 2021; 11(6):e048006. <https://doi.org/10.1136/bmjopen-2020-048006> PMID: 34155078
63. Xu JJ, Chen JT, Belin TR, Brookmeyer RS, Suchard MA, Ramirez CM. Racial and Ethnic Disparities in Years of Potential Life Lost Attributable to COVID-19 in the United States: An Analysis of 45 States and the District of Columbia. *Int J Environ Res Public Health.* 2021; 18(6). <https://doi.org/10.3390/ijerph18062921> PMID: 33809240
64. Scannell Bryan M, Sun J, Jagai J, Horton DE, Montgomery A, Sargis R, et al. Coronavirus disease 2019 (COVID-19) mortality and neighborhood characteristics in Chicago. *Ann Epidemiol.* 2021; 56:47–54.e5. <https://doi.org/10.1016/j.annepidem.2020.10.011> PMID: 33181262
65. Rozenfeld Y, Beam J, Maier H, Haggerson W, Boudreau K, Carlson J, et al. A model of disparities: risk factors associated with COVID-19 infection. *Int J Equity Health.* 2020; 19(1):126. <https://doi.org/10.1186/s12939-020-01242-z> PMID: 32727486
66. Marr KA, Platt A, Tornheim JA, Zhang SX, Datta K, Cardozo C, et al. Aspergillosis Complicating Severe Coronavirus Disease. *Emerg Infect Dis.* 2021; 27(1):18–25. <https://doi.org/10.3201/eid2701.202896> PMID: 33084566
67. Thompson Iii GR, Cornely OA, Pappas PG, Patterson TF, Hoenigl M, Jenks JD, et al. Invasive Aspergillosis as an Under-recognized Superinfection in COVID-19. *Open Forum Infect Dis.* 2020; 7(7):ofaa242. <https://doi.org/10.1093/ofid/ofaa242> PMID: 32754626
68. Arastehfar A, Carvalho A, van de Veerdonk FL, Jenks JD, Koehler P, Krause R, et al. COVID-19 Associated Pulmonary Aspergillosis (CAPA)-From Immunology to Treatment. *J Fungi (Basel).* 2020; 6(2). <https://doi.org/10.3390/jof6020091> PMID: 32599813
69. Kosmidis C, Denning DW. The clinical spectrum of pulmonary aspergillosis. *Thorax.* 2015; 70(3):270–277. <https://doi.org/10.1136/thoraxjnl-2014-206291> PMID: 25354514
70. United States Census Bureau. American Community Survey. Tables for Health Insurance Coverage. Accessed August 15, 2022. Available at: <https://www.census.gov/data/tables/time-series/demo/health-insurance/acs-hi.html>.
71. Mahajan S, Caraballo C, Lu Y, Valero-Elizondo J, Massey D, Annapureddy AR, et al. Trends in Differences in Health Status and Health Care Access and Affordability by Race and Ethnicity in the United States, 1999–2018. *JAMA.* 2021; 326(7):637–648. <https://doi.org/10.1001/jama.2021.9907> PMID: 34402830
72. Patterson TF, Thompson GR 3rd, Denning DW, Fishman JA, Hadley S, Herbrecht R, et al. Practice Guidelines for the Diagnosis and Management of Aspergillosis: 2016 Update by the Infectious Diseases Society of America. *Clin Infect Dis.* 2016; 63(4):e1–e60. <https://doi.org/10.1093/cid/ciw326> PMID: 27365388
73. Panackal AA, Li H, Kontoyiannis DP, Mori M, Perego CA, Boeckh M, et al. Geoclimatic influences on invasive aspergillosis after hematopoietic stem cell transplantation. *Clin Infect Dis.* 2010; 50(12):1588–1597. <https://doi.org/10.1086/652761> PMID: 20450414

74. Hurst SF, Berkow EL, Stevenson KL, Litvintseva AP, Lockhart SR. Isolation of azole-resistant *Aspergillus fumigatus* from the environment in the south-eastern USA. *J Antimicrob Chemother.* 2017; 72(9):2443–2446. <https://doi.org/10.1093/jac/dkx168> PMID: 28575384
75. Chouairi F, Fuery M, Clark KA, Mullan CW, Stewart J, Caraballo C, et al. Evaluation of Racial and Ethnic Disparities in Cardiac Transplantation. *J Am Heart Assoc.* 2021; 10(17):e021067. <https://doi.org/10.1161/JAHA.120.021067> PMID: 34431324
76. Harding K, Mersha TB, Pham PT, Waterman AD, Webb FA, Vassalotti JA, et al. Health Disparities in Kidney Transplantation for African Americans. *Am J Nephrol.* 2017; 46(2):165–175. <https://doi.org/10.1159/000479480> PMID: 28787713
77. Taber DJ, Gebregziabher M, Hunt KJ, Srinivas T, Chavin KD, Baliga PK, et al. Twenty years of evolving trends in racial disparities for adult kidney transplant recipients. *Kidney Int.* 2016; 90(4):878–887. <https://doi.org/10.1016/j.kint.2016.06.029> PMID: 27555121
78. Epstein AM, Ayanian JZ, Keogh JH, Noonan SJ, Armistead N, Cleary PD, et al. Racial disparities in access to renal transplantation—clinically appropriate or due to underuse or overuse? *N Engl J Med.* 2000; 343(21):1537–44, 2 p preceding. <https://doi.org/10.1056/NEJM200011233432106> PMID: 11087884
79. Monson RS, Kemerley P, Walczak D, Benedetti E, Oberholzer J, Danielson KK. Disparities in completion rates of the medical prerenal transplant evaluation by race or ethnicity and gender. *Transplantation.* 2015; 99(1):236–242. <https://doi.org/10.1097/TP.0000000000000271> PMID: 25531896
80. Vallabhaneni S, Benedict K, Derado G, Mody RK. Trends in Hospitalizations Related to Invasive Aspergillosis and Mucormycosis in the United States, 2000–2013. *Open Forum Infect Dis.* 2017; 4(1):ofw268. <https://doi.org/10.1093/ofid/ofw268> PMID: 28480260
81. Zilberberg MD, Nathanson BH, Harrington R, Spalding JR, Shorr AF. Epidemiology and Outcomes of Hospitalizations With Invasive Aspergillosis in the United States, 2009–2013. *Clin Infect Dis.* 2018; 67(5):727–735. <https://doi.org/10.1093/cid/ciy181> PMID: 29718296
82. O’Sullivan BP, Freedman SD. Cystic fibrosis. *Lancet.* 2009; 373(9678):1891–1904. [https://doi.org/10.1016/S0140-6736\(09\)60327-5](https://doi.org/10.1016/S0140-6736(09)60327-5) PMID: 19403164
83. Hong G, Psoter KJ, Jennings MT, Merlo CA, Boyle MP, Hadjiliadis D, et al. Risk factors for persistent *Aspergillus* respiratory isolation in cystic fibrosis. *J Cyst Fibros.* 2018; 17(5):624–630. <https://doi.org/10.1016/j.jcf.2018.01.008> PMID: 29444760
84. Wise SK, Ghegan MD, Gorham E, Schlosser RJ. Socioeconomic factors in the diagnosis of allergic fungal rhinosinusitis. *Otolaryngol Head Neck Surg.* 2008; 138(1):38–42. <https://doi.org/10.1016/j.otohns.2007.10.020> PMID: 18164991
85. Cornely OA, Alastruey-Izquierdo A, Arenz D, Chen SCA, Dannaoui E, Hochhegger B, et al. Global guideline for the diagnosis and management of mucormycosis: an initiative of the European Confederation of Medical Mycology in cooperation with the Mycoses Study Group Education and Research Consortium. *Lancet Infect Dis.* 2019. [https://doi.org/10.1016/S1473-3099\(19\)30312-3](https://doi.org/10.1016/S1473-3099(19)30312-3) PMID: 31699664
86. Garg D, Muthu V, Sehgal IS, Ramachandran R, Kaur H, Bhalla A, et al. Coronavirus Disease (Covid-19) Associated Mucormycosis (CAM): Case Report and Systematic Review of Literature. *Mycopathologia.* 2021;1–10. <https://doi.org/10.1007/s11046-021-00528-2> PMID: 33544266
87. Hoenigl M, Seidel D, Sprute R, Cunha C, Oliverio M, Goldman GH, et al. COVID-19-associated fungal infections. *Nat Microbiol.* 2022. <https://doi.org/10.1038/s41564-022-01172-2> PMID: 35918423
88. Rudramurthy SM, Hoenigl M, Meis JF, Cornely OA, Muthu V, Gangneux JP, et al. ECMM/ISHAM recommendations for clinical management of COVID -19 associated mucormycosis in low- and middle-income countries. *Mycoses.* 2021. <https://doi.org/10.1111/myc.13335> PMID: 34133816
89. Patel A, Agarwal R, Rudramurthy SM, Shevkani M, Kess I, Sharma R, et al. Multicenter Epidemiologic Study of Coronavirus Disease-Associated Mucormycosis, India. *Emerg Infect Dis.* 2021; 27(9):2349–2359. <https://doi.org/10.3201/eid2709.210934> PMID: 34087089
90. Hoenigl M. When disaster strikes fungi take control. *Lancet Respir Med.* 2022. [https://doi.org/10.1016/S2213-2600\(22\)00268-5](https://doi.org/10.1016/S2213-2600(22)00268-5) PMID: 36029798
91. Benedict K, Park BJ. Invasive fungal infections after natural disasters. *Emerg Infect Dis.* 2014; 20(3):349–355. <https://doi.org/10.3201/eid2003.131230> PMID: 24565446
92. Neblett Fanfair R, Benedict K, Bos J, Bennett SD, Lo Y-C, Adebajo T, et al. Necrotizing Cutaneous Mucormycosis after a Tornado in Joplin, Missouri, in 2011. *N Engl J Med.* 2012; 367(23):2214–2225. <https://doi.org/10.1056/NEJMoa1204781> PMID: 23215557
93. Davies BW, Smith JM, Hink EM, Durairaj VD. Increased Incidence of Rhino-Orbital-Cerebral Mucormycosis After Colorado Flooding. *Ophthal Plast Reconstr Surg.* 2017; 33(3S Suppl 1):S148–s51. <https://doi.org/10.1097/IOP.0000000000000448> PMID: 25794032



94. Cheng VCC, Chen JHK, Wong SCY, Leung SSM, So SYC, Lung DC, et al. Hospital Outbreak of Pulmonary and Cutaneous Zygomycosis due to Contaminated Linen Items From Substandard Laundry. *Clin Infect Dis*. 2016; 62(6):714–721. <https://doi.org/10.1093/cid/civ1006> PMID: 26668339
95. Maraví-Poma E, Rodríguez-Tudela JL, de Jalón JG, Manrique-Larralde A, Torroba L, Urtasun J, et al. Outbreak of gastric mucormycosis associated with the use of wooden tongue depressors in critically ill patients. *Intensive Care Med*. 2004; 30(4):724–728. <https://doi.org/10.1007/s00134-003-2132-1> PMID: 14991098
96. Park BJ, Pappas PG, Wannemuehler KA, Alexander BD, Anaissie EJ, Andes DR, et al. Invasive non-Aspergillus mold infections in transplant recipients, United States, 2001–2006. *Emerg Infect Dis*. 2011; 17(10):1855–1864. <https://doi.org/10.3201/eid1710.110087> PMID: 22000355
97. Roden MM, Zaoutis TE, Buchanan WL, Knudsen TA, Sarkisova TA, Schaufele RL, et al. Epidemiology and outcome of zygomycosis: a review of 929 reported cases. *Clin Infect Dis*. 2005; 41(5):634–653. <https://doi.org/10.1086/432579> PMID: 16080086
98. Hoenigl M, Salmanton-García J, Walsh TJ, Nucci M, Neoh CF, Jenks JD, et al. Global guideline for the diagnosis and management of rare mould infections: an initiative of the European Confederation of Medical Mycology in cooperation with the International Society for Human and Animal Mycology and the American Society for Microbiology. *Lancet Infect Dis*. 2021.
99. Jenks JD, Seidel D, Cornely OA, Chen S, van Hal S, Kauffman C, et al. Voriconazole plus terbinafine combination antifungal therapy for invasive *Lomentospora prolificans* infections: analysis of 41 patients from the FungiScope registry 2008–2019. *Clin Microbiol Infect*. 2020:S1198-743X(20)30037-9.
100. Jenks JD, Seidel D, Cornely OA, Chen S, van Hal S, Kauffman C, et al. Clinical Characteristics and Outcomes of invasive *Lomentospora prolificans* Infections: Analysis of Patients in the FungiScope Registry. *Mycoses*. 2020: <https://doi.org/10.1111/myc.13067> PMID: 32080902
101. Seidel D, Meissner A, Lackner M, Piepenbrock E, Salmanton-Garcia J, Stecher M, et al. Prognostic factors in 264 adults with invasive *Scedosporium* spp. and *Lomentospora prolificans* infection reported in the literature and FungiScope. *Crit Rev Microbiol*. 2019; 45(1):1–21.
102. Nucci M, Jenks J, Thompson GR, Hoenigl M, Santos MCD, Forghieri F, et al. Do high MICs predict the outcome in invasive fusariosis? *J Antimicrob Chemother*. 2020.
103. Nucci M, Marr KA, Vehreschild MJ, de Souza CA, Velasco E, Cappellano P, et al. Improvement in the outcome of invasive fusariosis in the last decade. *Clin Microbiol Infect*. 2013. <https://doi.org/10.1111/1469-0691.12409> PMID: 24118322
104. Revankar SG, Patterson JE, Sutton DA, Pullen R, Rinaldi MG. Disseminated phaeohiphomycosis: review of an emerging mycosis. *Clin Infect Dis*. 2002; 34(4):467–476. <https://doi.org/10.1086/338636> PMID: 11797173
105. Jenks JD, Reed SL, Seidel D, Koehler P, Cornely OA, Mehta SR, et al. Rare mould infections caused by Mucorales, *Lomentospora prolificans* and *Fusarium*, in San Diego, CA: the role of antifungal combination therapy. *Int J Antimicrob Agents*. 2018; 52(5):706–712. <https://doi.org/10.1016/j.ijantimicag.2018.08.005> PMID: 30099056
106. Chiller TM, Roy M, Nguyen D, Guh A, Malani AN, Latham R, et al. Clinical findings for fungal infections caused by methylprednisolone injections. *N Engl J Med*. 2013; 369(17):1610–1619. <https://doi.org/10.1056/NEJMoa1304879> PMID: 24152260
107. Horn DL, Freifeld AG, Schuster MG, Azie NE, Franks B, Kauffman CA. Treatment and outcomes of invasive fusariosis: review of 65 cases from the PATH Alliance registry. *Mycoses*. 2014; 57(11):652–658.
108. Revankar SG, Baddley JW, Chen SC, Kauffman CA, Slavin M, Vazquez JA, et al. A Mycoses Study Group International Prospective Study of Phaeohiphomycosis: An Analysis of 99 Proven/Probable Cases. *Open Forum Infect Dis*. 2017; 4(4):ofx200. <https://doi.org/10.1093/ofid/ofx200> PMID: 29766015
109. Pappas PG, Kauffman CA, Andes DR, Clancy CJ, Marr KA, Ostrosky-Zeichner L, et al. Clinical Practice Guideline for the Management of Candidiasis: 2016 Update by the Infectious Diseases Society of America. *Clin Infect Dis*. 2016; 62(4):e1–e50. <https://doi.org/10.1093/cid/civ933> PMID: 26679628
110. Ostrosky-Zeichner L, Al-Obaidi M. Invasive Fungal Infections in the Intensive Care Unit. *Infect Dis Clin North Am*. 2017; 31(3):475–487. <https://doi.org/10.1016/j.idc.2017.05.005> PMID: 28687215
111. Toda M, Williams SR, Berkow EL, Farley MM, Harrison LH, Bonner L, et al. Population-Based Active Surveillance for Culture-Confirmed Candidemia—Four Sites, United States, 2012–2016. *MMWR Surveill Summ*. 2019; 68(8):1–15. <https://doi.org/10.15585/mmwr.ss6808a1> PMID: 31557145
112. Tsay SV, Mu Y, Williams S, Epton E, Nadle J, Bamberg WM, et al. Burden of Candidemia in the United States, 2017. *Clin Infect Dis*. 2020; 71(9):e449–e453. <https://doi.org/10.1093/cid/ciaa193> PMID: 32107534



113. Seidelman J, Fleece M, Bloom A, Lydon E, Yang W, Arnold C, et al. Endogenous *Candida endophthalmitis*: Who is really at risk? *J Infect*. 2021; 82(2):276–281. <https://doi.org/10.1016/j.jinf.2020.12.032> PMID: 33412206
114. Andes DR, Safdar N, Baddley JW, Alexander B, Brumble L, Freifeld A, et al. The epidemiology and outcomes of invasive *Candida* infections among organ transplant recipients in the United States: results of the Transplant-Associated Infection Surveillance Network (TRANSNET). *Transpl Infect Dis*. 2016; 18(6):921–931. <https://doi.org/10.1111/tid.12613> PMID: 27643395
115. Cotch MF, Hillier SL, Gibbs RS, Eschenbach DA. Epidemiology and outcomes associated with moderate to heavy *Candida* colonization during pregnancy. Vaginal Infections and Prematurity Study Group. *Am J Obstet Gynecol*. 1998; 178(2):374–380. [https://doi.org/10.1016/s0002-9378\(98\)80028-8](https://doi.org/10.1016/s0002-9378(98)80028-8) PMID: 9500502
116. Geiger AM, Foxman B. Risk factors for vulvovaginal candidiasis: a case-control study among university students. *Epidemiology*. 1996; 7(2):182–187. <https://doi.org/10.1097/00001648-199603000-00013> PMID: 8834559
117. Foxman B, Barlow R, D'Arcy H, Gillespie B, Sobel JD. *Candida* vaginitis: self-reported incidence and associated costs. *Sex Transm Dis*. 2000; 27(4):230–235. <https://doi.org/10.1097/00007435-200004000-00009> PMID: 10782746
118. Patton LL, McKaig RG, Strauss RP, Eron JJ Jr. Oral manifestations of HIV in a southeast USA population. *Oral Dis*. 1998; 4(3):164–169. <https://doi.org/10.1111/j.1601-0825.1998.tb00274.x> PMID: 9972166
119. Hagen F, Khayhan K, Theelen B, Kolecka A, Polacheck I, Sionov E, et al. Recognition of seven species in the *Cryptococcus gattii*/*Cryptococcus neoformans* species complex. *Fungal Genet Biol*. 2015; 78:16–48. <https://doi.org/10.1016/j.fgb.2015.02.009> PMID: 25721988
120. Idnurm A, Lin X. Rising to the challenge of multiple *Cryptococcus* species and the diseases they cause. *Fungal Genet Biol*. 2015; 78:1–6. <https://doi.org/10.1016/j.fgb.2015.05.002> PMID: 25983191
121. Dixit A, Carroll SF, Qureshi ST. *Cryptococcus gattii*: An Emerging Cause of Fungal Disease in North America. *Interdiscip Perspect Infect Dis*. 2009; 2009:840452. <https://doi.org/10.1155/2009/840452> PMID: 19503836
122. Forsythe A, Vogan A, Xu J. Genetic and environmental influences on the germination of basidiospores in the *Cryptococcus neoformans* species complex. *Sci Rep*. 2016; 6:33828. <https://doi.org/10.1038/srep33828> PMID: 27644692
123. May RC, Stone NR, Wiesner DL, Bicanic T, Nielsen K. *Cryptococcus*: from environmental saprophyte to global pathogen. *Nat Rev Microbiol*. 2016; 14(2):106–117. <https://doi.org/10.1038/nrmicro.2015.6> PMID: 26685750
124. Williamson PR, Jarvis JN, Panackal AA, Fisher MC, Molloy SF, Loyse A, et al. Cryptococcal meningitis: epidemiology, immunology, diagnosis and therapy. *Nat Rev Neurol*. 2017; 13(1):13–24. <https://doi.org/10.1038/nrneurol.2016.167> PMID: 27886201
125. Park BJ, Wannemuehler KA, Marston BJ, Govender N, Pappas PG, Chiller TM. Estimation of the current global burden of cryptococcal meningitis among persons living with HIV/AIDS. *AIDS*. 2009; 23(4):525–530. <https://doi.org/10.1097/QAD.0b013e328322ffac> PMID: 19182676
126. Brizendine KD, Baddley JW, Pappas PG. Predictors of mortality and differences in clinical features among patients with Cryptococcosis according to immune status. *PLoS ONE*. 2013; 8(3):e60431. <https://doi.org/10.1371/journal.pone.0060431> PMID: 23555970
127. Harris JR, Lockhart SR, Debess E, Marsden-Haug N, Goldoft M, Wohrle R, et al. *Cryptococcus gattii* in the United States: clinical aspects of infection with an emerging pathogen. *Clin Infect Dis*. 2011; 53(12):1188–1195. <https://doi.org/10.1093/cid/cir723> PMID: 22016503
128. Jaen G, Drowos J, Hennekens CH, Levine RS. Lower Mortality Rates from Cryptococcosis in Women and Whites with Human Immunodeficiency Virus in the United States. *J Racial Ethn Health Disparities*. 2020; 7(1):117–120. <https://doi.org/10.1007/s40615-019-00640-6> PMID: 31664674
129. Bhatt M, Porterfield JZ, Ribes JA, Arora V, Myint T. Changing demographics and risk factors for cryptococcosis: A 12-year review at a tertiary care centre. *Mycoses*. 2021; 64(9):1073–1082. <https://doi.org/10.1111/myc.13323> PMID: 34033158
130. Hajjeh RA, Conn LA, Stephens DS, Baughman W, Hamill R, Graviss E, et al. Cryptococcosis: population-based multistate active surveillance and risk factors in human immunodeficiency virus-infected persons. Cryptococcal Active Surveillance Group. *J Infect Dis*. 1999; 179(2):449–454. <https://doi.org/10.1086/314606> PMID: 9878030
131. McKenney J, Smith RM, Chiller TM, Detels R, French A, Margolick J, et al. Prevalence and correlates of cryptococcal antigen positivity among AIDS patients—United States, 1986–2012. *MMWR Morb Mortal Wkly Rep*. 2014; 63(27):585–7. PMID: 25006824

132. Galgiani JN, Ampel NM, Blair JE, Catanzaro A, Johnson RH, Stevens DA, et al. Coccidioidomycosis. *Clin Infect Dis*. 2005; 41(9):1217–1223. <https://doi.org/10.1086/496991> PMID: 16206093
133. Chow NA, Kangiser D, Gade L, McCotter OZ, Hurst S, Salamone A, et al. Factors Influencing Distribution of *Coccidioides immitis* in Soil, Washington State, 2016. *mSphere*. 2021; 6(6):e0059821. <https://doi.org/10.1128/mSphere.00598-21> PMID: 34730378
134. Ampel N. The complex immunology of human coccidioidomycosis. *Ann N Y Acad Sci*. 2007;1111. <https://doi.org/10.1196/annals.1406.032> PMID: 17363432
135. Valdivia L, Nix D, Wright M, Lindberg E, Fagan T, Lieberman D, et al. Coccidioidomycosis as a common cause of community-acquired pneumonia. *Emerg Infect Dis*. 2006; 12(6):958–962. <https://doi.org/10.3201/eid1206.060028> PMID: 16707052
136. Benedict K, McCotter OZ, Brady S, Komatsu K, Sondermeyer Cooksey GL, et al. Surveillance for Coccidioidomycosis—United States, 2011–2017. *MMWR Surveill Summ*. 2019; 68(7):1–15. <https://doi.org/10.15585/mmwr.ss6807a1> PMID: 31538631
137. Huang JY, Bristow B, Shafir S, Sorvillo F. Coccidioidomycosis-associated Deaths, United States, 1990–2008. *Emerg Infect Dis*. 2012; 18(11):1723–1728. <https://doi.org/10.3201/eid1811.120752> PMID: 23092645
138. Smith DJ, Williams SL, Benedict KM, Jackson BR, Toda M. Surveillance for Coccidioidomycosis, Histoplasmosis, and Blastomycosis—United States, 2019. *MMWR Surveill Summ*. 2022; 71(7):1–14. <https://doi.org/10.15585/mmwr.ss7107a1> PMID: 36006889
139. Guevara RE, Motala T, Terashita D. The Changing Epidemiology of Coccidioidomycosis in Los Angeles (LA) County, California, 1973–2011. *PLoS ONE*. 2015; 10(8):e0136753. <https://doi.org/10.1371/journal.pone.0136753> PMID: 26313151
140. Sondermeyer Cooksey GL, Nguyen A, Vugia D, Jain S. Regional Analysis of Coccidioidomycosis Incidence—California, 2000–2018. *MMWR Morb Mortal Wkly Rep*. 2020; 69(48):1817–1821. <https://doi.org/10.15585/mmwr.mm6948a4> PMID: 33270616
141. Pope R, Wu J, Boone C. Spatial patterns of air pollutants and social groups: a distributive environmental justice study in the phoenix metropolitan region of USA. *Environ Manag*. 2016; 58(5):753–766. <https://doi.org/10.1007/s00267-016-0741-z> PMID: 27631674
142. Wheeler C, Lucas KD, Derado G, McCotter O, Tharratt RS, Chiller T, et al. Risk Stratification With Coccidioidal Skin Test to Prevent Valley Fever Among Inmates, California, 2015. *J Correct Health Care*. 2018; 24(4):342–351. <https://doi.org/10.1177/1078345818792679> PMID: 30099936
143. Lee LA, Yuan J, Vugia D, Wheeler C, Chapnick R, Mohle-Boetani J. Increased Coccidioidomycosis Among Inmates at a California Prison: Initial Investigation in 2005 to 2006. *J Correct Health Care*. 2017; 23(3):347–352. <https://doi.org/10.1177/1078345817716451> PMID: 28656821
144. Wheeler C, Lucas KD, Mohle-Boetani JC. Rates and risk factors for Coccidioidomycosis among prison inmates, California, USA, 2011. *Emerg Infect Dis*. 2015; 21(1):70–75. <https://doi.org/10.3201/eid2101.140836> PMID: 25533149
145. Edelson PJ, Harold R, Ackelsberg J, Duchin JS, Lawrence SJ, Manabe YC, et al. Climate Change and the Epidemiology of Infectious Diseases in the United States. *Clin Infect Dis*. 2022. <https://doi.org/10.1093/cid/ciac697> PMID: 36048507
146. Smith A, Laribi O. Environmental Justice in the American Public Health Context: Trends in the Scientific Literature at the Intersection Between Health, Environment, and Social Status. *J Racial Ethn Health Disparities*. 2022; 9(1):247–256. <https://doi.org/10.1007/s40615-020-00949-7> PMID: 33420608
147. Galgiani JN, Ampel NM, Blair JE, Catanzaro A, Geertsma F, Hoover SE, et al. Executive Summary: 2016 Infectious Diseases Society of America (IDSA) Clinical Practice Guideline for the Treatment of Coccidioidomycosis. *Clin Infect Dis*. 2016; 63(6):717–722. <https://doi.org/10.1093/cid/ciw538> PMID: 27559032
148. Durry E, Pappagianis D, Werner SB, Hutwagner L, Sun RK, Maurer M, et al. Coccidioidomycosis in Tulare County, California, 1991: reemergence of an endemic disease. *J Med Vet Mycol*. 1997; 35(5):321–326. <https://doi.org/10.1080/02681219780001361> PMID: 9402524
149. McCotter O, Kennedy J, McCollum J, Bartholomew M, Iralu J, Jackson BR, et al. Coccidioidomycosis Among American Indians and Alaska Natives, 2001–2014. *Open Forum Infect Dis*. 2019; 6(3):ofz052. <https://doi.org/10.1093/ofid/ofz052> PMID: 30882015
150. Pena-Ruiz MA, Meza AD, Mulla ZD. Coccidioidomycosis infection in a predominantly Hispanic population. *Ann N Y Acad Sci*. 2007; 1111:122–128. <https://doi.org/10.1196/annals.1406.038> PMID: 17344525

151. Sievers ML, Fisher JR. Decreasing incidence of disseminated coccidioidomycosis among Piman and San Carlos Apache Indians. A probable environmental basis. *Chest*. 1982; 82(4):455–460. <https://doi.org/10.1378/chest.82.4.455> PMID: 7116964
152. Gray GC, Fogle EF, Albright KL. Risk factors for primary pulmonary coccidioidomycosis hospitalizations among United States Navy and Marine Corps personnel, 1981–1994. *Am J Trop Med Hyg*. 1998; 58(3):309–312. <https://doi.org/10.4269/ajtmh.1998.58.309> PMID: 9546408
153. Flaherman VJ, Hector R, Rutherford GW. Estimating severe coccidioidomycosis in California. *Emerg Infect Dis*. 2007; 13(7):1087–1090. <https://doi.org/10.3201/eid1307.061480> PMID: 18214188
154. Noble JA, Nelson RG, Fufaa GD, Kang P, Shafir SC, Galgiani JN. Effect of Geography on the Analysis of Coccidioidomycosis-Associated Deaths. *United States. Emerg Infect Dis*. 2016; 22(10):1821–1823.
155. Seitz AE, Prevots DR, Holland SM. Hospitalizations associated with disseminated coccidioidomycosis, Arizona and California, USA. *Emerg Infect Dis*. 2012; 18(9):1476–1479. <https://doi.org/10.3201/eid1809.120151> PMID: 22931562
156. Rosenstein NE, Emery KW, Werner SB, Kao A, Johnson R, Rogers D, et al. Risk factors for severe pulmonary and disseminated coccidioidomycosis: Kern County, California, 1995–1996. *Clin Infect Dis*. 2001; 32(5):708–715. <https://doi.org/10.1086/319203> PMID: 11229838
157. Woods CW, McRill C, Plikaytis BD, Rosenstein NE, Mosley D, Boyd D, et al. Coccidioidomycosis in human immunodeficiency virus-infected persons in Arizona, 1994–1997: incidence, risk factors, and prevention. *J Infect Dis*. 2000; 181(4):1428–1434. <https://doi.org/10.1086/315401> PMID: 10753734
158. Cohen IM, Galgiani JN, Potter D, Ogden DA. Coccidioidomycosis in renal replacement therapy. *Arch Intern Med*. 1982; 142(3):489–494. PMID: 7039544
159. Arsur EL, Kilgore WB, Ratnayake SN. Erythema nodosum in pregnant patients with coccidioidomycosis. *Clin Infect Dis*. 1998; 27(5):1201–1203. <https://doi.org/10.1086/514985> PMID: 9827269
160. Smith CE, Beard RR. Varieties of coccidioid infection in relation to the epidemiology and control of the diseases. *Am J Public Health Nations Health*. 1946; 36(12):1394–1402. <https://doi.org/10.2105/ajph.36.12.1394> PMID: 20278046
161. Maxwell CS, Sepulveda VE, Turissini DA, Goldman WE, Matute DR. Recent admixture between species of the fungal pathogen *Histoplasma*. *Evol Lett*. 2018; 2(3):210–220. <https://doi.org/10.1002/evl3.59> PMID: 30283677
162. Sepúlveda VE, Márquez R, Turissini DA, Goldman WE, Matute DR. Genome Sequences Reveal Cryptic Speciation in the Human Pathogen *Histoplasma capsulatum*. *MBio*. 2017; 8(6). <https://doi.org/10.1128/mBio.01339-17> PMID: 29208741
163. Benedict K, Thompson GR 3rd, Deresinski S, Chiller T. Mycotic Infections Acquired outside Areas of Known Endemicity, United States. *Emerg Infect Dis*. 2015; 21(11):1935–1941. <https://doi.org/10.3201/eid2111.141950> PMID: 26485441
164. Wheat LJ, Connolly-Stringfield PA, Baker RL, Curfman MF, Eads ME, Israel KS, et al. Disseminated histoplasmosis in the acquired immune deficiency syndrome: clinical findings, diagnosis and treatment, and review of the literature. *Medicine (Baltimore)*. 1990; 69(6):361–374. <https://doi.org/10.1097/00005792-199011000-00004> PMID: 2233233
165. Ferreira OG, Cardoso SV, Borges AS, Ferreira MS, Loyola AM. Oral histoplasmosis in Brazil. *Oral Surg Oral Med Oral Pathol Oral Radiol Endod*. 2002; 93(6):654–659. <https://doi.org/10.1067/moe.2002.122588> PMID: 12142871
166. Antonello VS, Zaltron VF, Vial M, Oliveira FM, Severo LC. Oropharyngeal histoplasmosis: report of eleven cases and review of the literature. *Rev Soc Bras Med Trop*. 2011; 44(1):26–29. <https://doi.org/10.1590/s0037-86822011000100007> PMID: 21340403
167. Wheat LJ, Slama TG, Norton JA, Kohler RB, Eitzen HE, French ML, et al. Risk factors for disseminated or fatal histoplasmosis. Analysis of a large urban outbreak. *Ann Intern Med*. 1982; 96(2):159–163. <https://doi.org/10.7326/0003-4819-96-2-159> PMID: 7059062
168. Armstrong PA, Jackson BR, Haselow D, Fields V, Ireland M, Austin C, et al. Multistate Epidemiology of Histoplasmosis, United States, 2011–2014. *Emerg Infect Dis*. 2018; 24(3):425–431. <https://doi.org/10.3201/eid2403.171258> PMID: 29460731
169. Wheat LJ. Improvements in diagnosis of histoplasmosis. *Expert Opin Biol Ther*. 2006; 6(11):1207–1221. <https://doi.org/10.1517/14712598.6.11.1207> PMID: 17049017
170. Brown EM, McTaggart LR, Zhang SX, Low DE, Stevens DA, Richardson SE. Phylogenetic analysis reveals a cryptic species *Blastomyces gilchristii*, sp. nov. within the human pathogenic fungus *Blastomyces dermatitidis*. *PLoS ONE*. 2013; 8(3):e59237. <https://doi.org/10.1371/journal.pone.0059237> PMID: 23533607

171. Roy M, Benedict K, Deak E, Kirby MA, McNeil JT, Sickler CJ, et al. A large community outbreak of blastomycosis in Wisconsin with geographic and ethnic clustering. *Clin Infect Dis*. 2013; 57(5):655–662. <https://doi.org/10.1093/cid/cit366> PMID: 23735332
172. McDonald R, Dufort E, Jackson BR, Tobin EH, Newman A, Benedict K, et al. Notes from the Field: Blastomycosis Cases Occurring Outside of Regions with Known Endemicity—New York, 2007–2017. *MMWR Morb Mortal Wkly Rep*. 2018; 67(38):1077–1078. <https://doi.org/10.15585/mmwr.mm6738a8> PMID: 30260940
173. Benedict K, Gibbons-Burgener S, Kocharian A, Ireland M, Rothfeldt L, Christophe N, et al. Blastomycosis Surveillance in 5 States, United States, 1987–2018. *Emerg Infect Dis*. 2021; 27(4):999–1006. <https://doi.org/10.3201/eid2704.204078> PMID: 33757624
174. Seitz AE, Younes N, Steiner CA, Prevots DR. Incidence and trends of blastomycosis-associated hospitalizations in the United States. *PLoS ONE*. 2014; 9(8):e105466. <https://doi.org/10.1371/journal.pone.0105466> PMID: 25126839
175. Baumgardner DJ, Buggy BP, Mattson BJ, Burdick JS, Ludwig D. Epidemiology of blastomycosis in a region of high endemicity in north central Wisconsin. *Clin Infect Dis*. 1992; 15(4):629–635. <https://doi.org/10.1093/clind/15.4.629> PMID: 1420675
176. Pappas PG, Threlkeld MG, Bedsole GD, Cleveland KO, Gelfand MS, Dismukes WE. Blastomycosis in immunocompromised patients. *Medicine (Baltimore)*. 1993; 72(5):311–325. <https://doi.org/10.1097/00005792-199309000-00003> PMID: 8412644
177. Anderson JL, Frost HM, King JP, Meece JK. Racial Differences in Clinical Phenotype and Hospitalization of Blastomycosis Patients. *Open Forum Infect Dis*. 2019; 6(11):ofz438. <https://doi.org/10.1093/ofid/ofz438> PMID: 31696142
178. Lemos LB, Guo M, Baliga M. Blastomycosis: organ involvement and etiologic diagnosis. A review of 123 patients from Mississippi. *Ann Diagn Pathol*. 2000; 4(6):391–406. <https://doi.org/10.1053/adpa.2000.20755> PMID: 11149972
179. Khuu D, Shafir S, Bristow B, Sorvillo F. Blastomycosis mortality rates, United States, 1990–2010. *Emerg Infect Dis*. 2014; 20(11):1789–1794. <https://doi.org/10.3201/eid2011.131175> PMID: 25339251
180. Dworkin MS, Duckro AN, Proia L, Semel JD, Huhn G. The epidemiology of blastomycosis in Illinois and factors associated with death. *Clin Infect Dis*. 2005; 41(12):e107–e111. <https://doi.org/10.1086/498152> PMID: 16288388
